# Supplementary figures and images for: Immunization Information Systems: A Decade of Progress in Law and Policy
Source: PubMed Central journal article supplement — J Public Health Manag Pract. Author manuscript; Available in PMC 2015 Dec 7. (PMC4671281; doi:10.1097/phh.0000000000000040), 2015

**Figure 1a – IIS Authorizing Laws by Jurisdiction, 2012 and 2000**

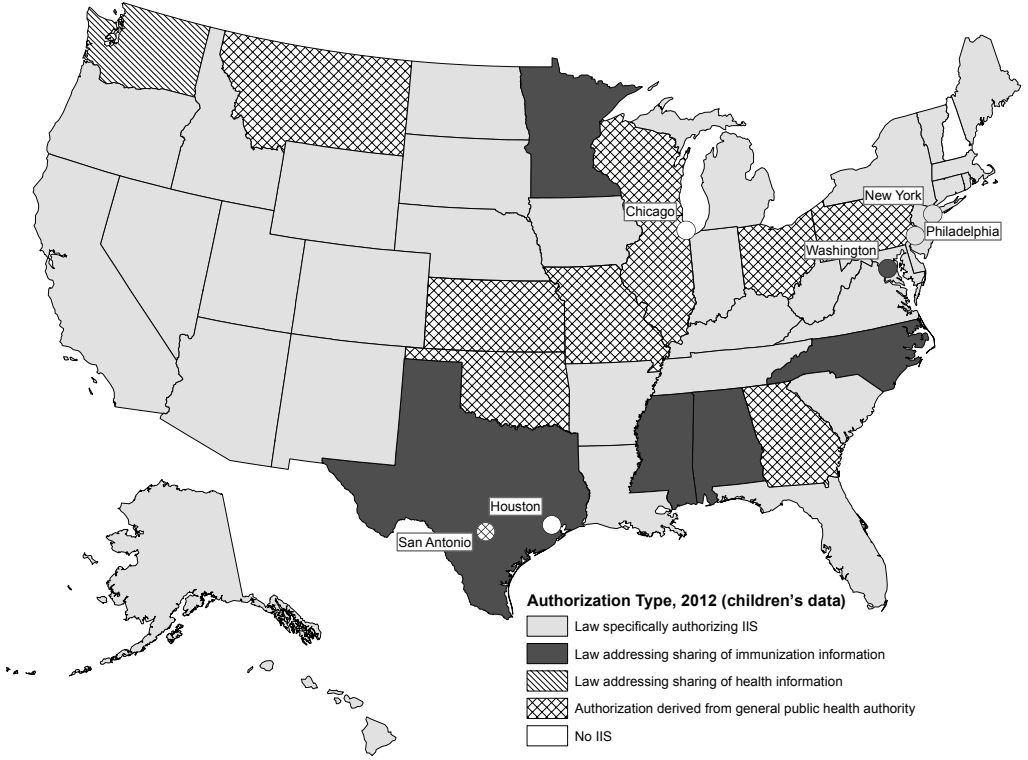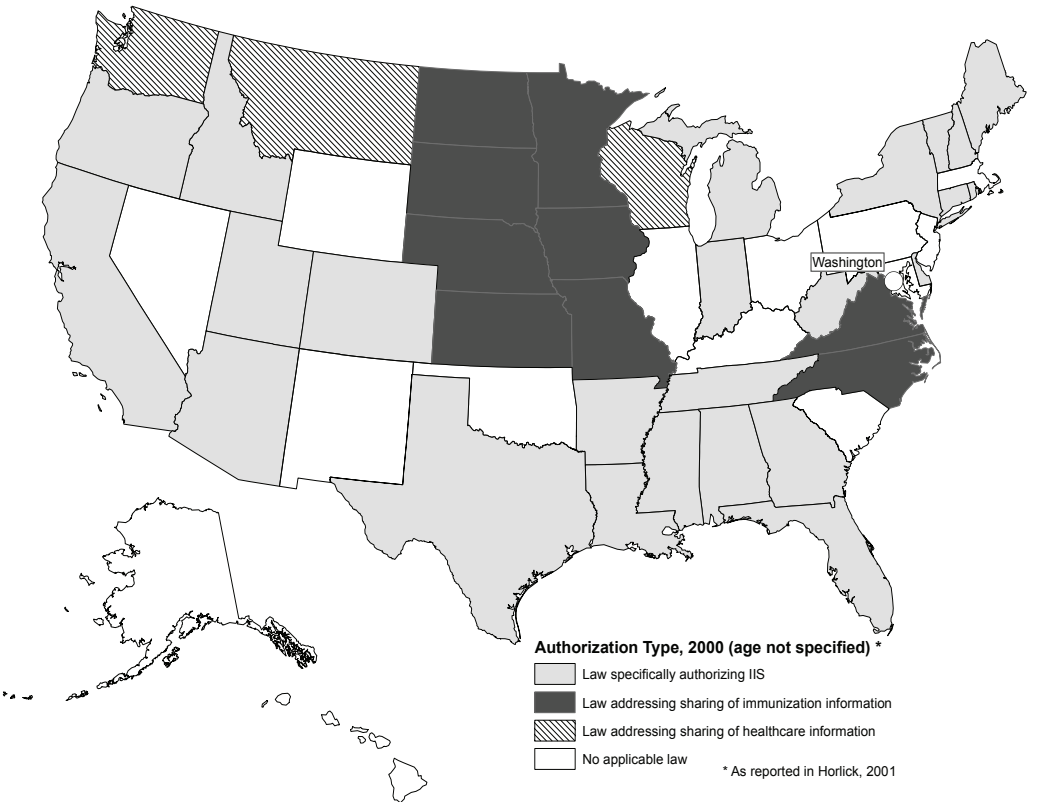

Supplement: NIHMS739517-supplement-01.pdf [file NIHMS739517-supplement-01.pdf]

**Figure 2a – Mandate to report immunizations to an IIS by Jurisdiction, 2012 and 2000**

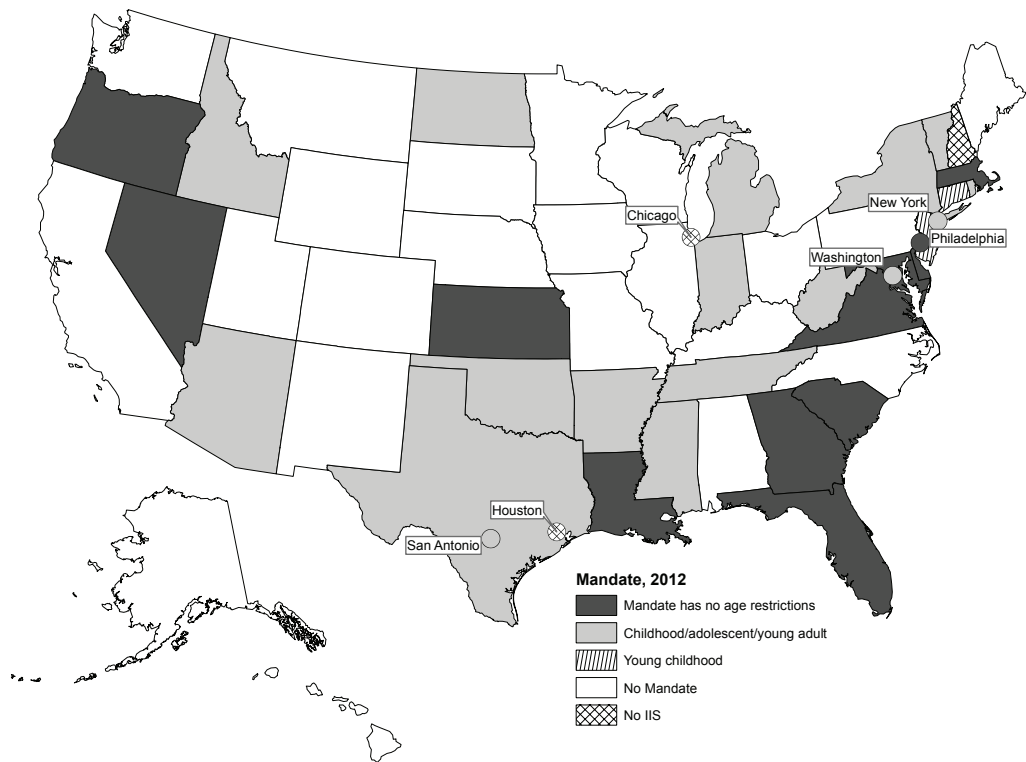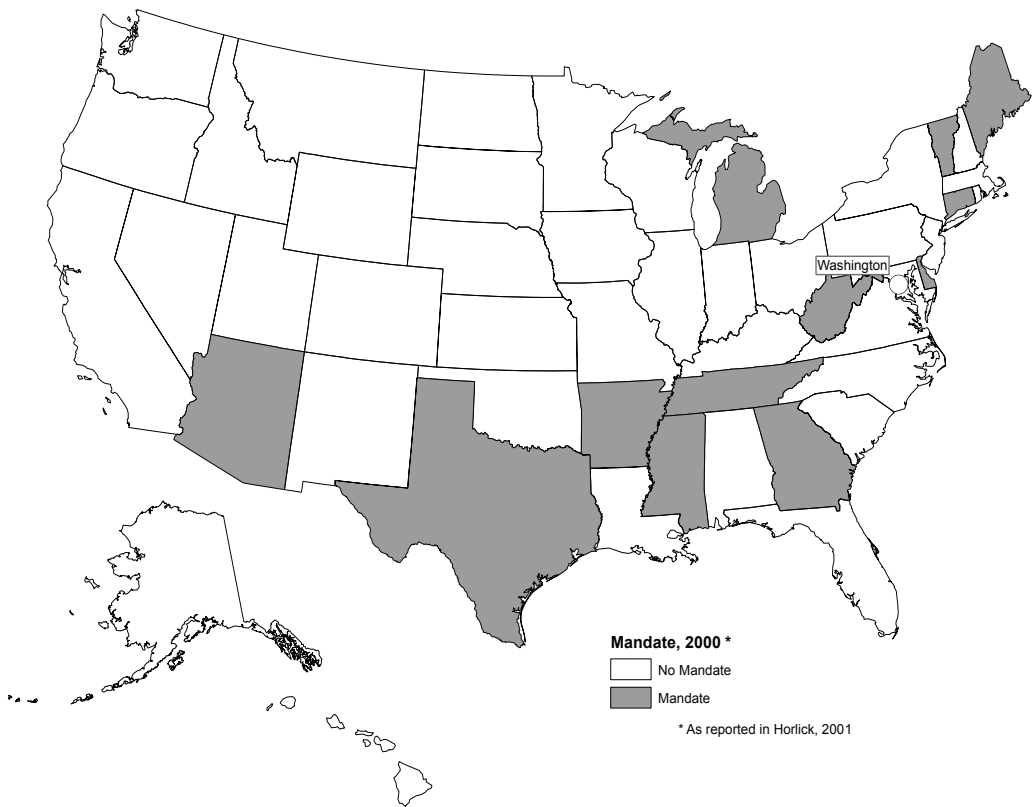

Supplement: NIHMS739517-supplement-02.pdf [file NIHMS739517-supplement-02.pdf]
